# Supplementary figures and images for: Flexible full two-dimensional memristive synapses of graphene/WSe2−xOy/graphene
Source: Royal Society of Chemistry journal article supplement (doi:10.1039/d0cp03822a), 2020-01-01

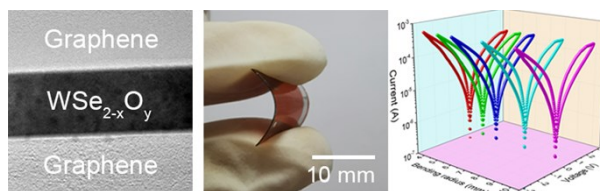

TOC figure

8 × 2.43 cm

Flexible memristive synapses based on full two-dimensional materials

Supplement: d0cp03822a2.pdf [file d0cp03822a2.pdf]
